# Supplementary material
Source: PubMed Central journal article supplement (PMC8569602)
Supplement: jama-e2119499-s001.pdf [file jama-e2119499-s001.pdf]

## Supplemental Online Content

Tenforde MW, Self WH, Adams K, et al; for the IVY Network. Association between mRNA vaccination and COVID-19 hospitalization and disease severity. *JAMA*. Published online November 4, 2021. doi:10.1001/jama.2021.19499

**eAppendix 1.** Investigators and Collaborators

**eAppendix 2.** Supplementary Tables and Figures

**eTable 1.** Modified WHO COVID-19 Clinical Progression Scale Used in This Analysis to Assess Disease Severity Among Adults Hospitalized With COVID-19

**eTable 2.** Underlying Medical Conditions Obtained Through Medical Record Review

**eTable 3.** Association Between Hospitalization for COVID-19 and Prior Receipt of Full Vaccination With a Two-Dose Series of a mRNA Vaccine, Restricted to Patients Without Immunocompromising Conditions

**eTable 4.** Association Between Hospitalization for COVID-19 and Prior Receipt of Full Vaccination With a Two-Dose Series of a mRNA Vaccine, Restricted to Patients Without Immunocompromising Conditions and Aged 18-64 Years

**eTable 5.** Association Between Hospitalization for COVID-19 and Prior Receipt of Full Vaccination With a Two-Dose Series of a mRNA Vaccine, Restricted to Patients Without Immunocompromising Conditions and Aged  $\geq 65$  Years

**eTable 6.** Treatments, Outcomes, and Severity of Illness Among Hospitalized COVID-19 Cases by Vaccination Status

**eTable 7.** Odds Prior mRNA COVID-19 Vaccination Among COVID-19 Cases Who Received In-Hospital COVID-19 Therapeutics and Those Who Did Not

**eFigure 1.** Whole Genome Sequencing SARS-CoV-2 Lineage Determination Among COVID-19 Cases by Admission Week

**eFigure 2.** Highest Severity Level Experienced on the WHO COVID-19 Clinical Progression Scale During the First 28 Days of Hospitalization Among Vaccine Breakthrough COVID-19 Cases and Unvaccinated COVID-19 Cases

This supplemental material has been provided by the authors to give readers additional information about their work.

## **I. Supplementary Appendix A. Investigators and Collaborators**

Investigators and collaborators in the Influenza and Other Viruses in the Acutely Ill (IVY) Network

### **Baylor, Scott and White, Texas A&M University College of Medicine, Temple Texas**

Manjusha Gaglani, Tresa McNeal, Shekhar Ghamande, Nicole Calhoun, Kempapura Murthy, Judy Herrick, Amanda McKillop, Eric Hoffman, Martha Zayed, Michael Smith

### **Baystate Medical Center, Springfield, Massachusetts**

Jay Steingrub, Ryan Kindle, Lori-Ann Kozikowski, Lesley De Souza, Scott Ouellette, Sherell Thornton-Thompson

### **Beth Israel Medical Center, Boston Massachusetts**

Nate Shapiro

### **Centers for Disease Control and Prevention (CDC), Atlanta, Georgia**

Miwako Kobayashi, Samantha Olson, Manish Patel, Mark Tenforde, Meagan Stephenson, Stephanie Schrag, Jennifer Verani, Katherine Adams

### **Cleveland Clinic, Cleveland, Ohio**

Abhijit Duggal, Omar Mehkri, Kiran Ashok, Susan Gole, Alexander King, Bryan Poynter

### **Emory University, Atlanta, Georgia**

Laurence Busse, Caitlin ten Lohuis, Nicholas Stanley

### **Hennepin County Medical Center, Minneapolis, Minnesota**

Matthew Prekker, Heidi Erickson, Audrey Hendrickson, Ellen Maruggi, Tyler Scharber

### **Intermountain Medical Center, Murray, Utah**

Ithan Peltan, Samuel Brown, Jeffrey Jorgensen, Robert Bowers, Jennifer King, Valerie Aston

### **Johns Hopkins University, Baltimore, Maryland**

David N, Hager, Arber Shehu, Richard E. Rothman

### **Montefiore Medical Center, Bronx, New York**

Michelle Gong, Amira Mohamed, Rahul Nair, Jen-Ting (Tina) Chen

### **Ohio State Medical Center, Columbus, Ohio**

Matthew Exline, Sarah Karow, Emily Robart, Paulo Nunes Maldonado, Maryiam Khan, Preston So

### **Oregon Health and Sciences University, Portland, Oregon**

Akram Khan, Catherine L. Hough

### **Stanford University, Stanford, California**

Jennifer G. Wilson, Alexandra June Gordon, Joe Levitt, Cynthia Perez, Anita Visweswaran, Jonasel Roque

### **University of California-Los Angeles, Los Angeles, California**

Nida Qadir, Steven Chang, Adreanne Rivera, Trevor Frankel

**University of Colorado School of Medicine, Aurora, Colorado**

Adit Ginde, Josh Douin, Michelle Howell, Jennifer Friedel, Jennifer Goff, David Huynh, Michael Tozier, Conner Driver, Michael Carricato, Alexandra Foster

**University of Iowa, Iowa City, Iowa**

Nick Mohr, Anne Zepeski, Paul Nassar, Lori Stout, Zita Sibenaller, Alicia Walter, Jasmine Mares, Logan Olson, Bradley Clinansmith

**University of Miami, Miami, Florida**

Chris Mallow, Hayley Gershengorn, Carolina Rivas

**University of Michigan, Ann Arbor, Michigan**

Emily Martin, Arnold Monto, Adam Luring, EJ McSpadden, Rachel Truscon, Anne Kaniclides, Lara Thomas, Ramsay Bielak, Weronika Damek Valvano, Rebecca Fong, William J. Fitzsimmons, Christopher Blair, Andrew L. Valesano, Julie Gilbert

**University of Washington, Seattle, Washington**

Daniel J. Henning, Christine D. Crider, Kyle A. Steinbock, Thomas C. Paulson, Layla A. Anderson

**Vanderbilt University Medical Center, Nashville, Tennessee**

Wesley H. Self, H. Keipp Talbot, Chris Lindsell, Carlos Grijalva, Ian Jones, Natasha Halasa, James Chappell, Kelsey Womack, Jillian Rhoads, Adrienne Baughman, Christy Kampe, Jakea Johnson, Rendie McHenry, Marcia Blair, Laura Short, Kim Hart, Robert McClellan, Todd Rice, Jonathan Casey, William B. Stubblefield

**Wake Forest University, Winston-Salem, North Carolina**

D. Clark Files, Kevin Gibbs, Mary LaRose, Leigha Landreth, Madeline Hicks, Lisa Parks

**Washington University, St. Louis, Missouri**

Hilary Babcock, Jennie Kwon, Jahnvi Bongu, David McDonald, Candice Cass, Sondra Seiler, David Park, Tiffany Hink, Meghan Wallace, Carey-Ann Burnham, Olivia G. Arter

## II. Supplementary Appendix B. Supplementary Tables and Figures

**Supplementary Table 1.** Modified WHO COVID-19 Clinical Progression Scale used in this analysis to assess disease severity among adults hospitalized with COVID-19.

| Patient State                  | Descriptor                                                                                                             | Severity Level                        |
|--------------------------------|------------------------------------------------------------------------------------------------------------------------|---------------------------------------|
| Uninfected                     | Uninfected; no viral RNA detected                                                                                      | 0<br>[not evaluated in this analysis] |
| Ambulatory mild disease        | Asymptomatic; viral RNA detected                                                                                       | 1<br>[not evaluated in this analysis] |
|                                | Symptomatic; independent                                                                                               | 2<br>[not evaluated in this analysis] |
|                                | Symptomatic; assistance needed                                                                                         | 3<br>[not evaluated in this analysis] |
| Hospitalized: moderate disease | Hospitalized; no oxygen therapy                                                                                        | 4                                     |
|                                | Hospitalized; standard oxygen therapy by mask or nasal prongs                                                          | 5                                     |
| Hospitalized: severe disease   | Hospitalized, oxygen by high flow nasal cannula or non-invasive ventilation                                            | 6                                     |
|                                | Invasive mechanical ventilation                                                                                        | 7                                     |
|                                | Invasive mechanical ventilation plus other organ support including ECMO, vasopressors or new renal replacement therapy | 8                                     |
| Death                          | Death                                                                                                                  | 9                                     |

Abbreviations: ECMO = extracorporeal membrane oxygenation; RNA = ribonucleic acid; WHO = world health organization

<sup>a</sup> Uninfected and mild severity were not included as the sample was restricted to hospitalized, laboratory-confirmed COVID-19 cases.

**Supplementary Table 2.** Underlying medical conditions obtained through medical record review. Condition categories included cardiovascular disease, neurologic disease, pulmonary disease, gastrointestinal disease, endocrine disease, renal disease, hematologic disease, malignancy, immunosuppression not captured in other categories, autoimmune condition, other condition (sarcoidosis, amyloidosis, unintentional weight loss  $\geq 10$  pounds in the last 90 days). All conditions considered as immunocompromising are noted (\*).

|                                                                                                              |
|--------------------------------------------------------------------------------------------------------------|
| <b>Cardiovascular disease</b>                                                                                |
| Heart failure                                                                                                |
| Peripheral vascular disease that limits mobility                                                             |
| Prior myocardial infarction                                                                                  |
| Cardiac arrhythmias including atrial fibrillation and ventricular arrhythmias                                |
| Valvular heart disease                                                                                       |
| Hypertension                                                                                                 |
| <b>Neurologic disease</b>                                                                                    |
| Dementia                                                                                                     |
| Prior stroke                                                                                                 |
| Prior transient ischemic attack (TIA, "mini-stroke")                                                         |
| Brain or spinal cord injury with loss of limb function                                                       |
| Cerebral palsy                                                                                               |
| Muscular dystrophy                                                                                           |
| Multiple sclerosis                                                                                           |
| Myasthenia gravis                                                                                            |
| Anterolateral sclerosis (ALS)                                                                                |
| <b>Pulmonary disease</b>                                                                                     |
| Asthma                                                                                                       |
| Chronic obstructive pulmonary disease                                                                        |
| Cystic fibrosis                                                                                              |
| Pulmonary fibrosis                                                                                           |
| Pulmonary hypertension                                                                                       |
| Home oxygen use (except at night for sleep disorder)                                                         |
| Tracheostomy                                                                                                 |
| Home non-invasive ventilation use (except at night for sleep disorder)                                       |
| Home invasive ventilation use                                                                                |
| <b>Gastrointestinal disease</b>                                                                              |
| Feeding through a tube                                                                                       |
| Inflammatory bowel disease including Crohn's Disease or Ulcerative Colitis*                                  |
| Cirrhosis (clinical diagnosis of cirrhosis)                                                                  |
| Chronic liver disease without cirrhosis                                                                      |
| Peptic ulcer disease                                                                                         |
| <b>Endocrine disease</b>                                                                                     |
| Diabetes mellitus without end organ damage                                                                   |
| Diabetes mellitus with end organ damage                                                                      |
| Adrenal insufficiency                                                                                        |
| Hypothyroidism                                                                                               |
| <b>Renal disease</b>                                                                                         |
| Chronic kidney disease without chronic renal replacement therapy                                             |
| End stage renal disease on chronic renal replacement therapy (including hemodialysis or peritoneal dialysis) |
| Prior kidney transplant*                                                                                     |
| <b>Hematologic disease</b>                                                                                   |

|                                                                                                                                                                    |
|--------------------------------------------------------------------------------------------------------------------------------------------------------------------|
| Sickle cell disease (all variants)                                                                                                                                 |
| Prior stem cell or bone marrow transplant*                                                                                                                         |
| Coagulopathy or other bleeding disorder, such as hemophilia                                                                                                        |
| Chronic anemia                                                                                                                                                     |
| Thalassemia                                                                                                                                                        |
| <b>Cancer/Malignancy</b>                                                                                                                                           |
| Active solid organ cancer without metastases; active cancer defined as treatment for the cancer or newly diagnosed cancer in the past 6 months*                    |
| Active solid organ cancer with metastases; active cancer defined as treatment for the cancer or newly diagnosed cancer in the past 6 months*                       |
| Active hematologic cancer (such as leukemia/lymphoma/myeloma) or active cancer defined as treatment for the cancer or newly diagnosed cancer in the past 6 months* |
| <b>Other immunosuppression</b>                                                                                                                                     |
| Human Immunodeficiency Virus (HIV) infection without AIDS*                                                                                                         |
| AIDS*                                                                                                                                                              |
| Congenital immunodeficiency disorder*                                                                                                                              |
| Prior splenectomy*                                                                                                                                                 |
| Prior solid organ transplant*                                                                                                                                      |
| Immunosuppression medication*                                                                                                                                      |
| Other immunosuppression condition                                                                                                                                  |
| <b>Autoimmune</b>                                                                                                                                                  |
| Systemic Lupus Erythematosus*                                                                                                                                      |
| Rheumatoid arthritis*                                                                                                                                              |
| Psoriasis*                                                                                                                                                         |
| Scleroderma*                                                                                                                                                       |
| Other autoimmune disease                                                                                                                                           |
| <b>Other</b>                                                                                                                                                       |
| Unintentional weight loss of at least 10 pounds in past 90 days                                                                                                    |
| Sarcoidosis                                                                                                                                                        |
| Amyloidosis                                                                                                                                                        |

**Supplementary Table 3.** Association between hospitalization for COVID-19 and prior receipt of full vaccination with a two-dose series of a mRNA vaccine, restricted to patients without immunocompromising conditions.

| <b>Subgroup</b>                                                                                | <b>Vaccinated Case Patients / Total Case Patients (%)</b> | <b>Vaccinated Control Patients / Total Control Patients (%)</b> | <b>Absolute Difference (95% CI), %</b> | <b>Adjusted Odds Ratio (95% CI)<sup>a</sup></b> |
|------------------------------------------------------------------------------------------------|-----------------------------------------------------------|-----------------------------------------------------------------|----------------------------------------|-------------------------------------------------|
| <b>Overall</b>                                                                                 | 186/1662 (11.2)                                           | 1039/1942 (53.5)                                                | -42.3 (-45.0 to -39.6)                 | 0.10 (0.09 to 0.13)                             |
| <b>By age group</b>                                                                            |                                                           |                                                                 |                                        |                                                 |
| 18-49                                                                                          | 29/674 (4.3)                                              | 162/546 (29.7)                                                  | -25.4 (-29.5 to -21.2)                 | 0.09 (0.06 to 0.14)                             |
| 50-64                                                                                          | 42/528 (8.0)                                              | 276/558 (49.5)                                                  | -41.5 (-46.3 to -36.8)                 | 0.08 (0.06 to 0.12)                             |
| ≥65                                                                                            | 115/460 (25.0)                                            | 601/838 (71.7)                                                  | -46.7 (-51.7 to -41.7)                 | 0.12 (0.09 to 0.16)                             |
| <b>By time between vaccine dose #2 and illness onset</b>                                       |                                                           |                                                                 |                                        |                                                 |
| 14-120 days                                                                                    | 102/1578 (6.5)                                            | 840/1743 (48.2)                                                 | -41.7 (-44.4 to -39.1)                 | 0.09 (0.07 to 0.11)                             |
| >120 days                                                                                      | 84/1560 (5.4)                                             | 199/1102 (18.1)                                                 | -12.7 (-15.2 to -10.1)                 | 0.17 (0.12 to 0.24)                             |
| <b>By month of illness onset overall and by time between vaccine dose #2 and illness onset</b> |                                                           |                                                                 |                                        |                                                 |
| March-June 2021 overall (Alpha period)                                                         | 70/934 (7.5)                                              | 669/1330 (50.3)                                                 | -42.8 (-46.0 to -39.6)                 | 0.10 (0.07 to 0.13)                             |
| 14-120 days since vaccination                                                                  | 66/930 (7.1)                                              | 627/1288 (48.7)                                                 | -41.6 (-44.8 to -38.4)                 | 0.10 (0.07 to 0.13)                             |
| >120 days since vaccination                                                                    | 4/868 (0.5)                                               | 42/703 (6.0)                                                    | -5.5 (-7.3 to -3.7)                    | 0.09 (0.03 to 0.27)                             |
| July-August 2021 overall (Delta period)                                                        | 116/728 (15.9)                                            | 370/612 (60.5)                                                  | -44.5 (-49.2 to -39.8)                 | 0.11 (0.08 to 0.15)                             |
| 14-120 days since vaccination                                                                  | 36/648 (5.6)                                              | 213/455 (46.8)                                                  | -41.3 (-46.2 to -36.3)                 | 0.07 (0.04 to 0.10)                             |
| >120 days since vaccination                                                                    | 80/692 (11.6)                                             | 157/399 (39.3)                                                  | -27.8 (-33.1 to -22.4)                 | 0.17 (0.12 to 0.25)                             |
| <b>By SARS-CoV-2 lineage<sup>b</sup></b>                                                       |                                                           |                                                                 |                                        |                                                 |
| Alpha (B.1.1.7)                                                                                | 5/194 (2.6)                                               | 669/1330 (50.3)                                                 | -47.7 (-51.2 to -44.2)                 | 0.03 (0.01 to 0.07)                             |
| Delta (B.1617.2 or AY)                                                                         | 39/239 (16.3)                                             | 370/612 (60.5)                                                  | -44.1 (-50.2 to -38.1)                 | 0.10 (0.07 to 0.16)                             |
| <b>By vaccine product overall and by time between vaccine dose #2 and illness onset</b>        |                                                           |                                                                 |                                        |                                                 |
| Pfizer-BioNTech overall                                                                        | 133/1609 (8.3)                                            | 614/1517 (40.5)                                                 | -32.2 (-35.0 to -29.4)                 | 0.13 (0.10 to 0.17)                             |
| 14-120 days since vaccination                                                                  | 67/1543 (4.3)                                             | 496/1399 (35.5)                                                 | -31.1 (-33.8 to -28.4)                 | 0.10 (0.07 to 0.13)                             |
| >120 days since vaccination                                                                    | 66/1542 (4.3)                                             | 118/1021 (11.6)                                                 | -7.3 (-9.5 to -5.1)                    | 0.24 (0.17 to 0.35)                             |
| Moderna overall                                                                                | 53/1529 (3.5)                                             | 425/1328 (32.0)                                                 | -28.5 (-31.2 to -25.9)                 | 0.07 (0.05 to 0.10)                             |
| 14-120 days since vaccination                                                                  | 35/1511 (2.3)                                             | 344/1247 (27.6)                                                 | -25.3 (-27.9 to -22.7)                 | 0.07 (0.05 to 0.10)                             |

| <b>Subgroup</b>             | <b>Vaccinated Case Patients / Total Case Patients (%)</b> | <b>Vaccinated Control Patients / Total Control Patients (%)</b> | <b>Absolute Difference (95% CI), %</b> | <b>Adjusted Odds Ratio (95% CI)<sup>a</sup></b> |
|-----------------------------|-----------------------------------------------------------|-----------------------------------------------------------------|----------------------------------------|-------------------------------------------------|
| >120 days since vaccination | 18/1494 (1.2)                                             | 81/984 (8.2)                                                    | -7.0 (-8.8 to -5.2)                    | 0.08 (0.05 to 0.15)                             |

Abbreviations: CI = confidence interval; OR = odds ratio

<sup>a</sup> Models were mixed-effects logistic regression models with vaccination status (fully vaccinated vs unvaccinated) as the primary independent variable, case/control status (hospitalized with COVID-19 vs hospitalized without COVID-19) as the dependent variable, enrolling site as a random effect, and the following co-variables: admission date (biweekly intervals), age group (18-49, 50-64, ≥65 years), sex, and self-reported race/ethnicity. Models stratified by age group were adjusted for continuous age in years.

<sup>b</sup> Alpha estimates restricted to March-June illness onset dates (Alpha period); Delta estimates restricted to July-August illness onset dates (Delta period).



**Supplementary Table 4.** Association between hospitalization for COVID-19 and prior receipt of full vaccination with a two-dose series of a mRNA vaccine, restricted to patients without immunocompromising conditions and aged 18-64 years.

| <b>Subgroup</b>                                                                                | <b>Vaccinated Case Patients / Total Case Patients (%)</b> | <b>Vaccinated Control Patients / Total Control Patients (%)</b> | <b>Absolute Difference (95% CI), %</b> | <b>Adjusted Odds Ratio (95% CI)<sup>a</sup></b> |
|------------------------------------------------------------------------------------------------|-----------------------------------------------------------|-----------------------------------------------------------------|----------------------------------------|-------------------------------------------------|
| <b>Overall</b>                                                                                 | 71/1202 (5.9)                                             | 438/1104 (39.7)                                                 | -33.8 (-36.9 to -30.6)                 | 0.08 (0.06 to 0.11)                             |
| <b>By time between vaccine dose #2 and illness onset</b>                                       |                                                           |                                                                 |                                        |                                                 |
| 14-120 days                                                                                    | 49/1180 (4.2)                                             | 368/1034 (35.6)                                                 | -31.4 (-34.6 to -28.3)                 | 0.08 (0.05 to 0.11)                             |
| >120 days                                                                                      | 22/1153 (1.9)                                             | 70/736 (9.5)                                                    | -7.6 (-9.9 to -5.3)                    | 0.12 (0.07 to 0.21)                             |
| <b>By month of illness onset overall and by time between vaccine dose #2 and illness onset</b> |                                                           |                                                                 |                                        |                                                 |
| March-June 2021 overall (Alpha period)                                                         | 28/698 (4.0)                                              | 262/755 (34.7)                                                  | -30.7 (-34.4 to -27.0)                 | 0.09 (0.06 to 0.13)                             |
| 14-120 days since vaccination                                                                  | 27/697 (3.9)                                              | 242/735 (32.9)                                                  | -29.1 (-32.7 to -25.4)                 | 0.09 (0.06 to 0.14)                             |
| >120 days since vaccination                                                                    | 1/671 (0.1)                                               | 20/513 (3.9)                                                    | -3.7 (-5.4 to -2.0)                    | 0.03 (0.004 to 0.30)                            |
| July-August 2021 overall (Delta period)                                                        | 43/504 (8.5)                                              | 176/349 (50.4)                                                  | -41.9 (-47.7 to -36.1)                 | 0.08 (0.05 to 0.12)                             |
| 14-120 days since vaccination                                                                  | 22/483 (4.6)                                              | 126/299 (42.1)                                                  | -37.6 (-43.5 to -31.7)                 | 0.06 (0.03 to 0.10)                             |
| >120 days since vaccination                                                                    | 21/482 (4.4)                                              | 50/223 (22.4)                                                   | -18.1 (-23.8 to -12.3)                 | 0.13 (0.07 to 0.24)                             |
| <b>By vaccine product overall and by time between vaccine dose #2 and illness onset</b>        |                                                           |                                                                 |                                        |                                                 |
| Pfizer-BioNTech overall                                                                        | 54/1185 (4.6)                                             | 252/918 (27.5)                                                  | -22.9 (-26.0 to -19.8)                 | 0.12 (0.08 to 0.16)                             |
| 14-120 days since vaccination                                                                  | 36/1167 (3.1)                                             | 216/882 (24.5)                                                  | -21.4 (-24.4 to -18.4)                 | 0.10 (0.06 to 0.14)                             |
| >120 days since vaccination                                                                    | 18/1149 (1.6)                                             | 36/702 (5.1)                                                    | -3.6 (-5.3 to -1.8)                    | 0.21 (0.11 to 0.40)                             |
| Moderna overall                                                                                | 17/1148 (1.5)                                             | 186/852 (21.8)                                                  | -20.4 (-23.2 to -17.5)                 | 0.04 (0.03 to 0.08)                             |
| 14-120 days since vaccination                                                                  | 13/1144 (1.1)                                             | 152/818 (18.6)                                                  | -17.4 (-20.2 to -14.7)                 | 0.05 (0.03 to 0.08)                             |
| >120 days since vaccination                                                                    | 4/1135 (0.4)                                              | 34/700 (4.9)                                                    | -4.5 (-6.1 to -2.9)                    | 0.04 (0.01 to 0.12)                             |

Abbreviations: CI = confidence interval; OR = odds ratio

<sup>a</sup> Models were mixed-effects logistic regression models with vaccination status (fully vaccinated vs unvaccinated) as the primary independent variable, case/control status (hospitalized with COVID-19 vs hospitalized without COVID-19) as the dependent variable, enrolling site as a random effect, and the following co-variables: admission date (biweekly intervals), continuous age in years, sex, and self-reported race/ethnicity.

**Supplementary Table 5.** Association between hospitalization for COVID-19 and prior receipt of full vaccination with a two-dose series of a mRNA vaccine, restricted to patients without immunocompromising conditions and aged ≥65 years.

| <b>Subgroup</b>                                                                                | <b>Vaccinated Case Patients / Total Case Patients (%)</b> | <b>Vaccinated Control Patients / Total Control Patients (%)</b> | <b>Absolute Difference (95% CI), %</b> | <b>Adjusted Odds Ratio (95% CI)</b> |
|------------------------------------------------------------------------------------------------|-----------------------------------------------------------|-----------------------------------------------------------------|----------------------------------------|-------------------------------------|
| <b>Overall</b>                                                                                 | 115/460 (25.0)                                            | 601/838 (71.7)                                                  | -46.7 (-51.7 to -41.7)                 | 0.12 (0.09 to 0.16)                 |
| <b>By time between vaccine dose #2 and illness onset</b>                                       |                                                           |                                                                 |                                        |                                     |
| 14-120 days                                                                                    | 53/398 (13.3)                                             | 472/709 (66.6)                                                  | -53.3 (-58.1 to -48.4)                 | 0.09 (0.06 to 0.13)                 |
| >120 days                                                                                      | 62/407 (15.2)                                             | 129/366 (35.2)                                                  | -20.0 (-26.0 to -14.0)                 | 0.21 (0.13 to 0.32)                 |
| <b>By month of illness onset overall and by time between vaccine dose #2 and illness onset</b> |                                                           |                                                                 |                                        |                                     |
| March-June 2021 overall (Alpha period)                                                         | 42/236 (17.8)                                             | 407/575 (70.8)                                                  | -53.0 (-59.1 to -46.9)                 | 0.10 (0.06 to 0.14)                 |
| 14-120 days since vaccination                                                                  | 39/233 (16.7)                                             | 385/553 (69.2)                                                  | -52.9 (-59.0 to -46.7)                 | 0.09 (0.06 to 0.14)                 |
| >120 days since vaccination                                                                    | 3/197 (1.5)                                               | 22/190 (11.6)                                                   | -10.1 (-14.9 to -5.2)                  | 0.13 (0.03 to 0.50)                 |
| July-August 2021 overall (Delta period)                                                        | 73/224 (32.6)                                             | 194/263 (73.8)                                                  | -41.2 (-49.3 to -33.1)                 | 0.12 (0.07 to 0.20)                 |
| 14-120 days since vaccination                                                                  | 14/165 (8.5)                                              | 87/156 (55.8)                                                   | -47.3 (-56.2 to -38.4)                 | 0.07 (0.03 to 0.14)                 |
| >120 days since vaccination                                                                    | 59/210 (28.1)                                             | 107/176 (60.8)                                                  | -32.7 (-42.1 to -23.3)                 | 0.17 (0.10 to 0.30)                 |
| <b>By vaccine product overall and by time between vaccine dose #2 and illness onset</b>        |                                                           |                                                                 |                                        |                                     |
| Pfizer-BioNTech overall                                                                        | 79/424 (18.6)                                             | 362/599 (60.4)                                                  | -41.8 (-47.2 to -36.4)                 | 0.14 (0.10 to 0.19)                 |
| 14-120 days since vaccination                                                                  | 31/376 (8.2)                                              | 280/517 (54.2)                                                  | -45.9 (-51.0 to -40.8)                 | 0.09 (0.06 to 0.14)                 |
| >120 days since vaccination                                                                    | 48/393 (12.2)                                             | 82/319 (25.7)                                                   | -13.5 (-19.3 to -7.7)                  | 0.25 (0.15 to 0.40)                 |
| Moderna overall                                                                                | 36/381 (9.4)                                              | 239/476 (50.2)                                                  | -40.8 (-46.1 to -35.4)                 | 0.10 (0.07 to 0.15)                 |
| 14-120 days since vaccination                                                                  | 22/367 (6.0)                                              | 192/429 (44.8)                                                  | -38.8 (-44.1 to -33.5)                 | 0.09 (0.05 to 0.14)                 |
| >120 days since vaccination                                                                    | 14/359 (3.9)                                              | 47/284 (16.5)                                                   | -12.6 (-17.4 to -7.9)                  | 0.13 (0.07 to 0.27)                 |

Abbreviations: CI = confidence interval; OR = odds ratio

<sup>a</sup> Models were mixed-effects logistic regression models with vaccination status (fully vaccinated vs unvaccinated) as the primary independent variable, case/control status (hospitalized with COVID-19 vs hospitalized without COVID-19) as the dependent variable, enrolling site as a random effect, and the following co-variables: admission date (biweekly intervals), continuous age in years, sex, and self-reported race/ethnicity.

**Supplementary Table 6.** Treatments, outcomes, and severity of illness among hospitalized COVID-19 cases by vaccination status.

| Characteristic                                                                 | Vaccine breakthrough cases (n=142) | Unvaccinated cases (n = 1055) | P-value <sup>a</sup> |
|--------------------------------------------------------------------------------|------------------------------------|-------------------------------|----------------------|
| Any of the following COVID-19-related treatments, No. / Total (%) <sup>b</sup> | 77/117 (65.8)                      | 862/1024 (84.2)               | <.001                |
| Corticosteroids                                                                | 74/117 (63.2)                      | 824/1024 (80.5)               | <.001                |
| Remdesivir                                                                     | 52/117 (44.4)                      | 650/1024 (63.5)               | <.001                |
| Convalescent plasma                                                            | 9/117 (7.7)                        | 23/1024 (2.2)                 | .001                 |
| Tocilizumab                                                                    | 11/117 (9.4)                       | 178/1024 (17.4)               | .03                  |
| Baricitinib                                                                    | 0/117 (0.0)                        | 7/1024 (0.7)                  | .37                  |
| Admitted to ICU, No. / Total (%)                                               | 35/142 (24.6)                      | 423/1055 (40.1)               | <.001                |
| Any oxygen support, No. / Total (%)                                            | 98/142 (69.0)                      | 889/1055 (84.3)               | <.001                |
| HFNC                                                                           | 21/142 (14.8)                      | 365/1055 (34.6)               | <.001                |
| NIPPV                                                                          | 20/142 (14.1)                      | 182/1055 (17.3)               | .34                  |
| IMV                                                                            | 11/142 (7.7)                       | 243/1055 (23.0)               | <.001                |
| ECMO                                                                           | 1/142 (0.7)                        | 39/1055 (3.7)                 | .06                  |
| Venous thromboembolic event, No. / Total (%) <sup>c</sup>                      | 7/142 (4.9)                        | 64/1055 (6.1)                 | .59                  |
| Stroke, No. / Total (%)                                                        | 0/142 (0.0)                        | 22/1055 (2.1)                 | .08                  |
| Myocardial infarction, No. / Total (%)                                         | 2/142 (1.4)                        | 21/1055 (2.0)                 | .64                  |
| Death within 28 days of admission, No. / Total (%)                             | 9/142 (6.3)                        | 91/1055 (8.6)                 | .36                  |
| Death or invasive mechanical ventilation, No. / Total (%)                      | 17/142 (12.0)                      | 261/1055 (24.7)               | .001                 |

Abbreviations: ECMO = extracorporeal membrane oxygenation; HFNC = high-flow nasal cannula; ICU = intensive care unit; IMV = invasive mechanical ventilation; NIPPV = nasal intermittent positive-pressure ventilation

<sup>a</sup> Chi-square test p-values presented.

<sup>b</sup> COVID-19 treatment data reported only for patients known by their treating clinicians to have COVID-19; this excluded patients with negative SARS-CoV-2 clinical testing who were enrolled as a test-negative control and later reclassified as a case based on positive SARS-CoV-2 research testing that was not available to clinicians.

<sup>c</sup> Deep vein thrombosis and/or pulmonary embolism.

**Supplementary Table 7.** Odds of prior mRNA COVID-19 vaccination among COVID-19 cases who received in-hospital COVID-19 therapeutics<sup>a</sup> and those who did not.

|                                                     | Fully vaccinated cases (n=117) | Unvaccinated cases (n = 1024) | Absolute different (95% CI) | Adjusted odds ratio of treatment (vaccinated versus unvaccinated) <sup>b</sup> |                |
|-----------------------------------------------------|--------------------------------|-------------------------------|-----------------------------|--------------------------------------------------------------------------------|----------------|
|                                                     |                                |                               |                             | aOR                                                                            | 95% CI         |
|                                                     | No./Total (%)                  | No./Total (%)                 |                             |                                                                                |                |
| <b>Received ≥1 COVID-19 therapeutic<sup>c</sup></b> |                                |                               |                             |                                                                                |                |
| Overall                                             | 77/117 (65.8)                  | 862/1024 (84.2)               | -18.4 (-27.2 to -9.5)       | 0.32                                                                           | (0.20 to 0.52) |
| Without immunocompromising condition                | 30/63 (47.6)                   | 740/883 (83.8)                | -36.2 (-48.7 to -23.6)      | 0.19                                                                           | (0.11 to 0.33) |
| With immunocompromising condition                   | 47/54 (87.0)                   | 122/141 (86.5)                | 0.5 (-10.1 to 11.1)         | 0.79                                                                           | (0.28 to 2.26) |
| Age 18-64                                           | 32/51 (62.7)                   | 672/791 (85.0)                | -22.2 (-35.7 to -8.7)       | 0.24                                                                           | (0.12 to 0.46) |
| Age ≥65                                             | 45/66 (68.2)                   | 190/233 (81.5)                | -13.4 (-25.6 to -1.1)       | 0.42                                                                           | (0.21 to 0.85) |

Abbreviation: aOR = adjusted odds ratio; CI = confidence interval

<sup>a</sup> Information on COVID-19 therapeutics was not collected on patients enrolled as test-negative controls who later had a positive research SARS-CoV-2 RT-PCR test; denominator therefore includes COVID-19 case patients enrolled as SARS-CoV-2 cases.

<sup>b</sup> Adjusted for age group (18-49, 50-64, ≥65 years), sex, race and ethnicity, number of underlying conditions by category (0, 1, 2, 3, ≥4).

<sup>c</sup> COVID-19 therapeutic agents including systemic corticosteroids, remdesivir, convalescent plasma, tocilizumab, or baricitinib.

**eFigure 1.** Whole genome sequencing SARS-CoV-2 lineage determination among COVID-19 cases by admission week. The predominate variant changed from Alpha (B.1.1.7) to Delta (B1.617.2) in June 2021. The x-axis date represents the end date of the admission week. The y-axis represents the number of successfully sequenced SARS-CoV-2 viruses.

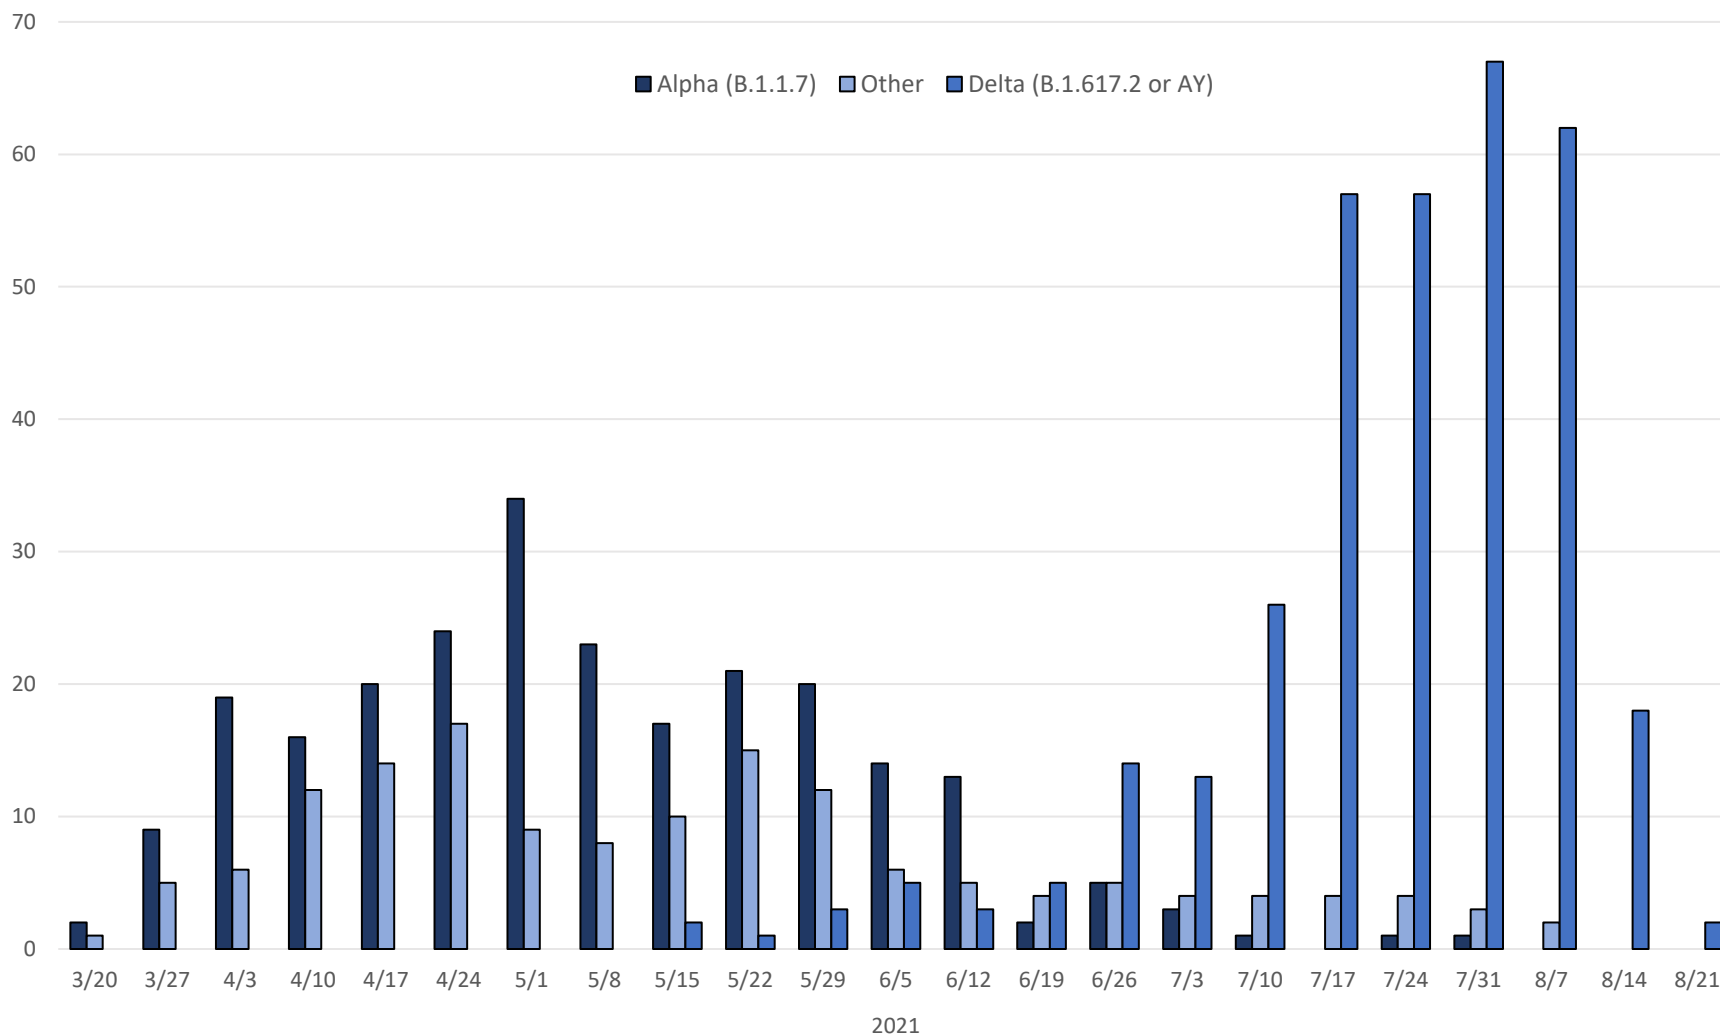

<sup>a</sup> SARS-CoV-2 lineages were assigned with >80% coverage using PANGOLIN. Viruses underwent whole genome sequencing if the cycle threshold value for at least one of 2 nucleocapsid gene targets was <32; 730/1983 (36.8%) cases were successfully sequenced. Other non-Alpha (B.1.1.7) and non-Delta (B.1.617.2 or AY) lineages sequenced included: Gamma/P.1 (44), B.1.526 (14), B.1.526.1 (12), B.1.429 (11), B.1.621 (11), B.1 (10), B.1.1.519 (7), B.1.2 (6), Beta B.1.351 (6), B.1.526.3 (4), B.1.1.28 (3), B.1.526.2 (3), C.37 (3), B.1.525 (2), B.1.621.1 (2), B.1.623 (2), B.1.628 (2), B.1.1.318 (1), B.1.1.372 (1), B.1.1.361 (1), B.1.441 (1), B.1.517 (1), B.1.612 (1), C.36.3 (1), R.1 (1).

**eFigure 2.** Highest severity level experienced on the WHO COVID-19 Clinical Progression Scale during the first 28 days of hospitalization among vaccine breakthrough COVID-19 cases and unvaccinated COVID-19 cases. Overall, the severity level was lower in vaccinated breakthrough cases than unvaccinated cases (adjusted odds ratio<sup>a</sup>: 0.36; 95% CI: 0.25—0.51).

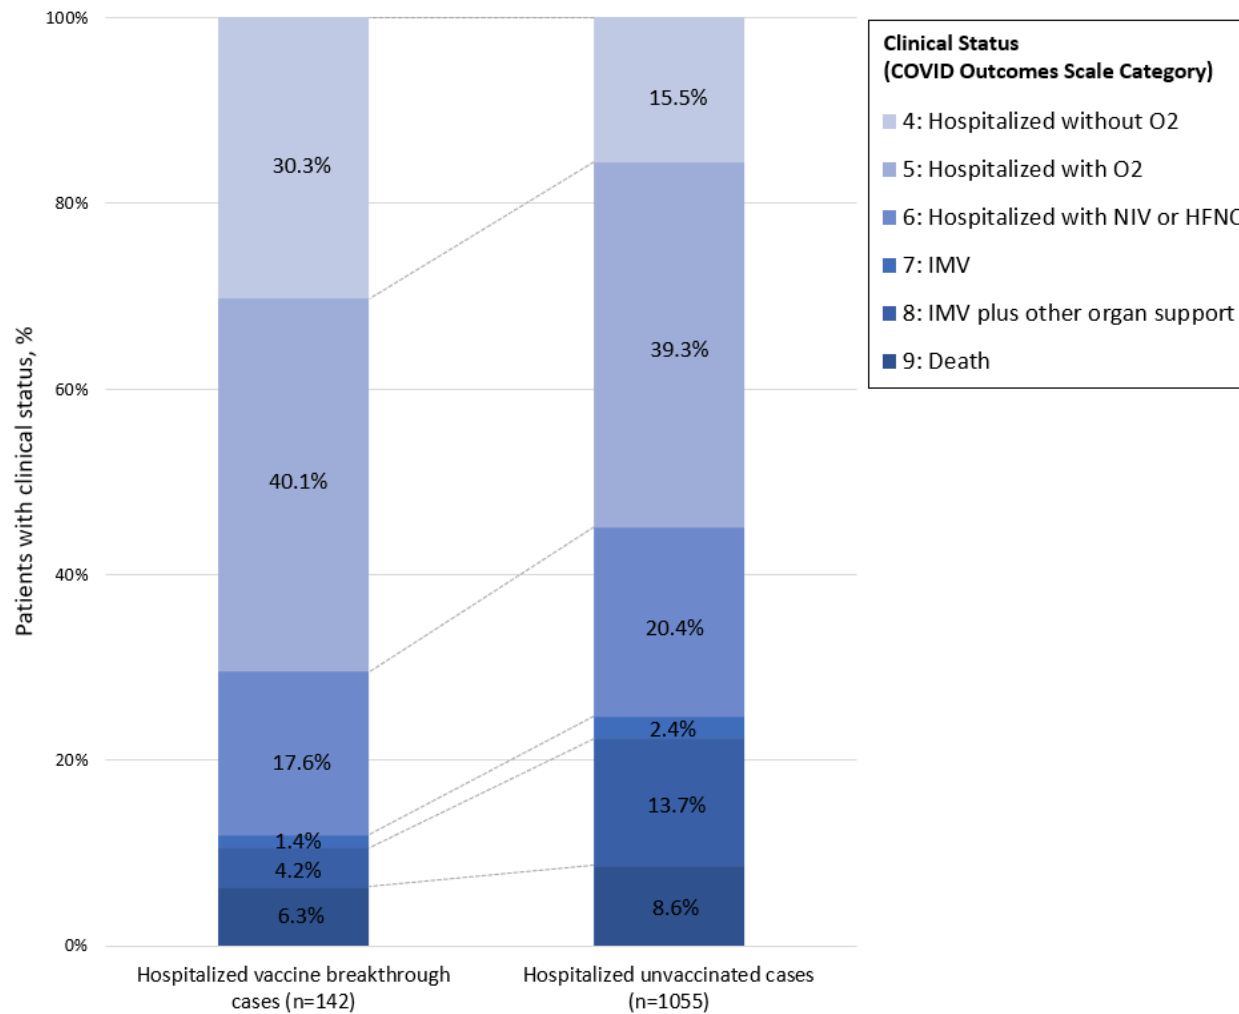

| <b>Clinical status<br/>(COVID Outcomes Scale category)</b>                     | <b>Vaccine breakthrough<br/>cases (n=142)</b> | <b>Unvaccinated cases<br/>(n=1053)</b> |
|--------------------------------------------------------------------------------|-----------------------------------------------|----------------------------------------|
| 4: Hospitalized; no oxygen therapy                                             | 43 (30.3%)                                    | 164 (15.5%)                            |
| 5: Hospitalized; standard oxygen therapy by mask or nasal prongs               | 57 (40.1%)                                    | 415 (39.3%)                            |
| 6: Hospitalized, oxygen by high flow nasal cannula or non-invasive ventilation | 25 (17.6%)                                    | 215 (20.4%)                            |
| 7: Invasive mechanical ventilation                                             | 2 (1.4%)                                      | 25 (2.4%)                              |
| 8: Invasive mechanical ventilation plus other organ support                    | 6 (4.2%)                                      | 145 (13.7%)                            |
| 9: Death                                                                       | 9 (6.3%)                                      | 91 (8.6%)                              |

Abbreviations: HFNC = high-flow nasal cannula; IMV = invasive mechanical ventilation; NIV = non-invasive ventilation; O2 = oxygen

<sup>a</sup> Adjusted for age group (18-49, 50-64, ≥65 years), sex, race and ethnicity, number of underlying conditions by category (0, 1, 2, 3, ≥4).
